# Supplementary material
Source: publisher figshare collection journal article supplement (https://karger.figshare.com/ndownloader/files/20134880)
Supplement: Supplementary file 1 [file 20134880]

**Supplemental Appendix**

**Supplemental Table 1. KDIGO staging of AKI**

**KDIGO: Kidney Disease Improving Global Outcomes; AKI: acute kidney injury; RRT: renal replacement therapy.**

**Supplemental Table 2. The factors associated with stage 2 or higher AKI**

AKI: acute kidney injury; OR: odds ratio; CI: confidence interval; ALL: acute lymphoblastic leukemia; AML: acute myeloid leukemia; MPAL: mix-phenotype acute leukemia; MDS: myelodysplastic syndromes; ML: malignant lymphoma; ATL: adult T-cell leukemia-lymphoma; MM: multiple myeloma; PB: peripheral blood: BM: bone marrow; CB: cord blood; RIC: reduced-intensity conditioning; MAC: myeloablative conditioning; TBI: total body irradiation; HCT-CI: hematopoietic cell transplant-comorbidity index; AMPH-B: amphotericin-B; SOS: sinusoidal obstruction syndrome; TMA: thrombotic microangiopathy; DIC: disseminated intravascular coagulation.

**Supplemental Table 3. The factors associated with stage 3 AKI**

AKI: acute kidney injury; OR: odds ratio; CI: confidence interval; ALL: acute lymphoblastic leukemia; AML: acute myeloid leukemia; MPAL: mix-phenotype acute leukemia; MDS: myelodysplastic syndromes; ML: malignant lymphoma; ATL: adult T-cell leukemia-lymphoma; MM: multiple myeloma; PB: peripheral blood: BM: bone marrow; CB: cord blood; RIC: reduced-intensity conditioning; MAC: myeloablative conditioning; TBI: total body irradiation; HCT-CI: hematopoietic cell transplant-comorbidity index; AMPH-B: amphotericin-B; SOS: sinusoidal obstruction syndrome; TMA: thrombotic microangiopathy; DIC: disseminated intravascular coagulation.

¶Included liposomal amphotericin B (L-AMPH)
